# Supplementary material for: Insertion of phosphinidene complexes into the P–H bond of secondary phosphine oxides: a new version of the phospha-Wittig synthesis of PC double bonds
Source: Royal Society of Chemistry journal article supplement (doi:10.1039/c5dt04245c), 2015-12-14
Supplement: c5dt04245c1.pdf [file c5dt04245c1.pdf]

| <b>Table of Contents</b>                                            | <b>Page</b> |
|---------------------------------------------------------------------|-------------|
| General Experimental Details                                        | S-2         |
| General procedure and characterization data for 2a-2e               | S-2         |
| Procedure and characterization data for<br>dithienylphosphine oxide | S-7         |
| General procedure and characterization<br>data for 2f, zg           | S-8         |
| Procedure and characterization data for compound 4                  | S-10        |
| Procedure and characterization data for compound 5                  | S-12        |
| Procedure and characterization data for compound 6                  | S-13        |
| Procedure and characterization data for compound 8a,b               | S-14        |
| Procedure and characterization data for compound 9                  | S-15        |

## General Experimental Details

All reactions were performed under nitrogen using solvents dried by standard methods. NMR spectra were obtained using Bruker AV300 spectrometer. All spectra were recorded at 298 K in CDCl<sub>3</sub>. All coupling constants (*J* values) are reported in Hertz (Hz). Chemical shifts are expressed in parts per million (ppm) downfield from internal TMS. HRMS spectra were obtained on an Agilent 1290-6540 UHPLC Q-ToF HR-MS spectrometer. Element analyses were performed on a Thermo Flash EA 1112 automatic element analyzer. IR spectra were obtained on a Thermo Nicolet is50 FT-IR spectrometer. X-ray crystallographic analyses were performed on an Oxford diffraction Gemini E diffractometer. Silica gel (200-300 mesh) was used for the chromatographic separations. 7-phosphanorbornadiene complexes **1a**, **1b**, **1c**, **1d**, **1e** were prepared according to literature methods. Commercially available reagents were used without further purification.

## General procedure and characterization data for **2a-2e**:

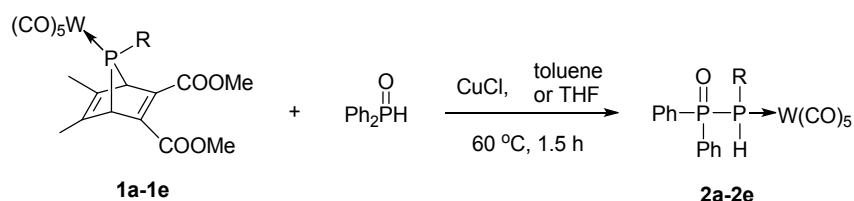

|           | R                                     | isolated yield<br>of <b>2a-2e</b> (%) |
|-----------|---------------------------------------|---------------------------------------|
| <b>a:</b> | Ph                                    | 77                                    |
| <b>b:</b> | Me                                    | 76                                    |
| <b>c:</b> | CH <sub>2</sub> CH <sub>2</sub> COOEt | 51                                    |
| <b>d:</b> | CH <sub>2</sub> CH <sub>2</sub> Cl    | 52                                    |
| <b>e:</b> | 2-Th                                  | 45                                    |

A solution of 7-R-7-phosphanorbornadiene complex **1a-1e**, diphenylphosphine oxide (1 eq) and CuCl (0.4 eq) in toluene or THF was stirred at 60 °C for 1.5 h. The solvents were removed *in vacuo*, and the residue was chromatographed at -15°C on silica gel using a 50:1 dichloromethane:THF mixture, to give a yellowish solid.

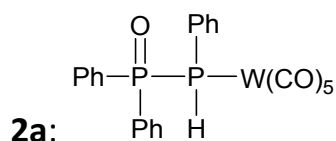

7-phenyl-7-phosphanorbornadiene complex **1a** (2.57 g, 3.9 mmol). Yield: 1.91 g, 77 %. Single crystal for X-ray analysis was grown from a solution of the compound **2a** in dichloromethane

$^{31}\text{P}\{^1\text{H}\}$  NMR ( $\text{CDCl}_3$ ):  $\delta$  34.0 ( $J_{\text{PP}} = 72.0$  Hz,  $\text{P}^{\text{V}}$ ), -33.2 ( $J_{\text{PP}} = 71.7$  Hz,  $^1J_{\text{PW}} = 226.4$  Hz,  $^1J_{\text{PH}} = 327.8$  Hz,  $\text{P}^{\text{III}}$ ).  $^1\text{H}$  NMR ( $\text{CDCl}_3$ ):  $\delta$  6.24 (dd, 1H, PH,  $J_{\text{PH}} = 326.7$  Hz), 7.29-7.39 (m, 7H, Ph), 7.46-7.66 (m, 6H, Ph), 7.80-7.87 (m, 2H, Ph).  $^{13}\text{C}\{^1\text{H}\}$  NMR ( $\text{CDCl}_3$ ):  $\delta$  126.31 (d,  $J_{\text{CP}} = 35.6$  Hz, C, Ph), 128.72 (d,  $J_{\text{CP}} = 12.3$  Hz, CH, Ph), 128.99 (d,  $J_{\text{CP}} = 10.9$  Hz, CH, Ph), 129.17 (d,  $J_{\text{CP}} = 12.2$  Hz, CH, Ph), 129.92 (dd,  $^1J_{\text{CP}} = 87.1$  Hz,  $^2J_{\text{CP}} = 14.9$  Hz, C, Ph), 130.67 (dd,  $^1J_{\text{CP}} = 87.1$  Hz,  $^2J_{\text{CP}} = 11.1$  Hz, C, Ph), 131.02 (d,  $J_{\text{CP}} = 10.0$  Hz, CH, Ph), 131.44 (d,  $J_{\text{CP}} = 9.7$  Hz, CH, Ph), 132.64 (d,  $J_{\text{CP}} = 2.9$  Hz, CH, Ph), 133.11 (d,  $J_{\text{CP}} = 2.6$  Hz, CH, Ph), 133.64 (d,  $J_{\text{CP}} = 3.1$  Hz, CH, Ph), 133.78 (d,  $J_{\text{CP}} = 3.1$  Hz, CH, Ph), 194.88 (dd,  $J_{\text{CP}} = 6.4$  Hz,  $J_{\text{CP}} = 1.4$  Hz,  $J_{\text{CW}} = 126.8$  Hz, CO *cis*), 197.48 (d,  $^2J_{\text{CP}}$

= 25.3 Hz, CO *trans*). HRMS:  $m/z$  635.0020 (calcd for  $C_{23}H_{17}O_6P_2W$ :  $[M+H]^+$ , 635.0010). IR (KBr)  $\nu(CO)$  2076 s, 1991s, 1909 vs  $cm^{-1}$ . Anal. Calcd for  $C_{23}H_{16}O_6P_2W$ : C, 43.56; H, 2.54. Found: C, 43.55; H, 2.41.

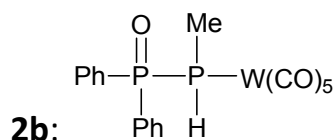

7-methyl-7-phosphanorbornadiene complex **1b** (1.20 g, 2.0 mmol).

Yield: 0.93 g, 76 %.

$^{31}P$  NMR ( $CDCl_3$ ):  $\delta$  34.2 ( $J_{PP} = 62.7$  Hz,  $P^V$ ), -68.3 ( $J_{PP} = 63.0$  Hz,  $^1J_{PW} = 223.6$  Hz,  $^1J_{PH} = 320.4$  Hz,  $P^{III}$ ).  $^1H$  NMR ( $CDCl_3$ ):  $\delta$  1.74-1.82 (m, 3H,  $CH_3$ ), 5.42 (dm,  $^1J_{PH} = 320.6$  Hz, 1H, PH), 7.58-7.65 (m, 6H, Ph), 7.83-7.92 (m, 4H, Ph).  $^{13}C\{^1H\}$  NMR ( $CDCl_3$ ):  $\delta$  7.39 (d,  $J_{CP} = 22.8$  Hz,  $CH_3$ ), 129.32 (d,  $J_{CP} = 12.3$  Hz, CH, Ph), 129.97 (d,  $J_{CP} = 10.9$  Hz, C, Ph), 130.52 (d,  $J_{CP} = 16.7$  Hz, C, Ph), 131.06 (d,  $J_{CP} = 10.1$  Hz, CH, Ph), 131.25 (d,  $J_{CP} = 9.7$  Hz, CH, Ph), 133.06 (d,  $J_{CP} = 2.7$  Hz, CH, Ph), 133.21 (d,  $J_{CP} = 2.3$  Hz, CH, Ph), 194.89 (dd,  $^2J_{CP} = 6.4$  Hz,  $^3J_{CP} = 1.2$  Hz,  $^1J_{CW} = 126.5$  Hz, CO *cis*), 197.49 (d,  $^2J_{CP} = 24.5$  Hz, CO *trans*). HRMS:  $m/z$  572.9852 (calcd for  $C_{18}H_{15}O_6P_2W$ :  $[M+H]^+$ , 572.9853). IR (KBr)  $\nu(CO)$  2075 s, 1992 w, 1912 vs  $cm^{-1}$ . Anal. Calcd for  $C_{18}H_{14}O_6P_2W$ : C, 37.79; H, 2.47. Found: C, 37.79; H, 2.47.

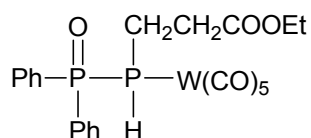

Diphosphine monoxide **2c**:

**1c** (3.9 g, 5.75 mmol). Yield: 1.39 g, 51 %.

$^{31}\text{P}\{^1\text{H}\}$  NMR ( $\text{CDCl}_3$ ):  $\delta$  34.7 ( $J_{\text{PP}} = 65.8$  Hz,  $\text{P}^{\text{V}}$ ), -53.7 ppm ( $J_{\text{PP}} = 64.9$  Hz,  $^1J_{\text{PW}} = 223.9$  Hz,  $^1J_{\text{PH}} = 330.1$  Hz,  $\text{P}^{\text{III}}$ ).  $^1\text{H}$  NMR ( $\text{CDCl}_3$ ):  $\delta$  1.24 (t,  $J_{\text{HH}} = 7.2$  Hz, 3H,  $\text{CH}_3$ ), 2.12-2.55 (dm, 2H,  $\text{PCH}_2$ ), 2.57-2.72 (m, 2H,  $\text{CH}_2\text{C}=\text{O}$ ), 4.12 (q,  $J_{\text{HH}} = 7.2$  Hz, 2H,  $\text{OCH}_2$ ), 5.60 (dm,  $^1J_{\text{PH}} = 325.5$  Hz, 1H, PH), 7.58-7.64 (m, 6H, Ph), 7.86-7.93 (m, 4H, Ph).  $^{13}\text{C}\{^1\text{H}\}$  NMR ( $\text{CDCl}_3$ ):  $\delta$  14.10 (s,  $\text{CH}_3$ ), 18.24 (d,  $J_{\text{CP}} = 21.0$  Hz,  $\text{PCH}_2$ ), 31.07 (d,  $J_{\text{CP}} = 5.5$  Hz,  $\text{CH}_2\text{C}=\text{O}$ ), 61.21 (s,  $\text{OCH}_2$ ), 129.38 (d,  $J_{\text{CP}} = 12.2$  Hz, CH, Ph), 129.43 (d,  $J_{\text{CP}} = 12.2$  Hz, CH, Ph), 130.35 (d,  $J_{\text{CP}} = 9.7$  Hz, C, Ph), 130.69 (d,  $J_{\text{CP}} = 16.7$  Hz, C, Ph), 131.01 (d,  $J_{\text{CP}} = 10.1$  Hz, CH, Ph), 131.21 (d,  $J_{\text{CP}} = 10.2$  Hz, CH, Ph), 133.09 (d,  $J_{\text{CP}} = 2.9$  Hz, CH, Ph), 133.27 (d,  $J_{\text{CP}} = 2.7$  Hz, CH, Ph), 171.55 (d,  $J_{\text{CP}} = 8.4$  Hz,  $\text{C}=\text{O}$ ), 194.68 (dd,  $^2J_{\text{CP}} = 6.4$  Hz,  $^3J_{\text{CP}} = 1.7$  Hz,  $^1J_{\text{CW}} = 124.7$  Hz, CO *cis*), 196.82 (d,  $^2J_{\text{CP}} = 24.8$  Hz, CO *trans*). HRMS:  $m/z$  659.0225 (calcd for  $\text{C}_{22}\text{H}_{21}\text{O}_8\text{P}_2\text{W}$ :  $[\text{M}+\text{H}]^+$ , 659.0221). IR (KBr)  $\nu(\text{CO})$  2077 s, 1939 vs  $\text{cm}^{-1}$ .

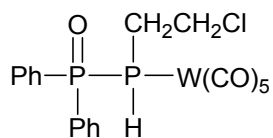

Diphosphine monoxide **2d**:

**1d** (580 mg, 0.9 mmol). Yield: 582 mg, 52 %.

$^{31}\text{P}\{^1\text{H}\}$  NMR ( $\text{CDCl}_3$ ):  $\delta$  34.1 ( $J_{\text{PP}} = 64.3$  Hz,  $\text{P}^{\text{V}}$ ), -61.5 ( $J_{\text{PP}} = 64.3$  Hz,  $^1J_{\text{PW}} = 226.7$  Hz,  $^1J_{\text{PH}} = 323.2$  Hz,  $\text{P}^{\text{III}}$ ).  $^1\text{H}$  NMR ( $\text{CDCl}_3$ ):  $\delta$  2.34-2.78 (dm, 2H,  $\text{PCH}_2$ ), 3.69-3.79 (m, 2H,  $\text{CH}_2\text{Cl}$ ), 5.63 (dm,  $^1J_{\text{PH}} = 322.8$  Hz, 1H, PH), 7.59-7.66 (m, 6H, Ph), 7.85-7.94 (m, 4H, Ph).  $^{13}\text{C}\{^1\text{H}\}$  NMR ( $\text{CDCl}_3$ ):  $\delta$  27.05 (dd,  $^1J_{\text{CP}} = 19.2$  Hz,  $^2J_{\text{CP}} = 2.2$  Hz,  $\text{PCH}_2$ ), 41.29 (d,  $^2J_{\text{CP}} = 6.3$  Hz,  $\text{CH}_2\text{Cl}$ ), 129.47 (d,  $J_{\text{CP}} = 12.2$  Hz, CH, Ph), 129.52 (d,  $J_{\text{CP}} = 12.3$  Hz, CH, Ph), 130.20 (d,  $^2J_{\text{CP}} = 10.0$  Hz, C, Ph), 130.48 (d,  $^2J_{\text{CP}} = 17.4$  Hz, C, Ph), 130.98 (d,  $J_{\text{CP}} = 10.1$  Hz, CH, Ph), 131.23 (d,  $J_{\text{CP}} = 9.1$  Hz, CH, Ph), 133.27 (d,  $J_{\text{CP}} = 3.0$  Hz, CH, Ph), 133.42 (d,  $J_{\text{CP}} = 2.5$  Hz, CH, Ph), 194.54 (dd,  $^2J_{\text{CP}} = 6.4$  Hz,  $^3J_{\text{CP}} = 1.7$  Hz,  $^1J_{\text{CW}} = 126.3$  Hz, CO *cis*), 196.55 (d,  $^2J_{\text{CP}} = 25.4$  Hz, CO *trans*). HRMS:  $m/z$  620.9609 (calcd for  $\text{C}_{19}\text{H}_{16}\text{ClO}_6\text{P}_2\text{W}$ :  $[\text{M}+\text{H}]^+$ , 620.9620).

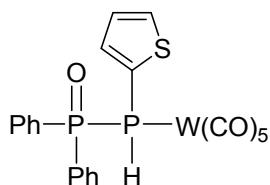

Diphosphine monoxide **2e**:

**1e** (528 mg, 0.8 mmol). Yield: 210 mg, 45 %.

$^{31}\text{P}\{^1\text{H}\}$  NMR ( $\text{CDCl}_3$ ):  $\delta$  34.4 ( $J_{\text{PP}} = 66.1$  Hz,  $\text{P}^{\text{V}}$ ), -53.7 ( $J_{\text{PP}} = 66.2$  Hz,  $^1J_{\text{PW}} = 231.6$  Hz,  $^1J_{\text{PH}} = 336.3$  Hz,  $\text{P}^{\text{III}}$ ).  $^1\text{H}$  NMR ( $\text{CDCl}_3$ ):  $\delta$  6.56 (dd,  $J_{\text{PH}} = 332.7$  Hz, 1H, PH), 7.11-7.78 (m, 13H, Ph, Th).  $^{13}\text{C}\{^1\text{H}\}$  NMR ( $\text{CDCl}_3$ ):  $\delta$  124.04 (d,  $^1J_{\text{CP}} = 33.6$  Hz, C, Th), 128.97 (d,  $J_{\text{CP}} = 12.5$  Hz, CH, Ph), 129.15 (d,  $J_{\text{CP}} = 12.8$  Hz, CH, Ph), 129.98 (d,  $^2J_{\text{CP}} = 11.4$  Hz, C, Ph), 130.15 (d,  $^2J_{\text{CP}} = 14.3$  Hz, C, Ph), 131.45 (d,  $J_{\text{CP}} = 9.8$  Hz, CH, Ph), 131.65 (d,  $J_{\text{CP}} = 9.7$  Hz, CH, Ph), 133.07 (d,

$J_{CP} = 2.7$  Hz, CH, Ph), 133.22 (d,  $J_{CP} = 2.8$  Hz, CH, Ph), 133.93 (s, CH, Th), 138.25 (d,  $J_{CP} = 3.9$  Hz, CH, Th), 138.37 (d,  $J_{CP} = 3.9$  Hz, CH, Th), 194.78 (dd,  $^2J_{CP} = 6.3$  Hz,  $^3J_{CP} = 1.3$  Hz,  $^1J_{CW} = 124.5$  Hz, CO *cis*), 197.12 (d,  $^2J_{CP} = 26.1$  Hz, CO *trans*). HRMS:  $m/z$  640.9575 (calcd for  $C_{21}H_{15}O_6P_2SW$ :  $[M+H]^+$ , 640.9574). IR (KBr)  $\nu(\text{CO})$  2076 s, 1982 s, 1915 vs  $\text{cm}^{-1}$ . Anal. Calcd for  $C_{21}H_{14}O_6P_2SW$ : C, 39.40; H, 2.20; S, 5.01. Found: C, 39.14; H, 2.29; S, 4.90.

**Procedure and characterization data for dithienylphosphine oxide:**

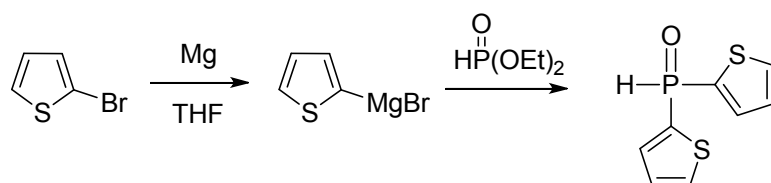

A 100 mL Schlenk flask with 360 mg (15 mmol, 3.0 eq) Mg was evacuated/ $N_2$  filled 3 times, then 10 mL dried THF and 0.2 mL 2-bromothiophene were added. After the initiation, 5 mL dried THF and 1.25 mL (15 mmol in total, 3.0 eq) 2-bromothiophene were added to the mixture. The mixture was stirred at ambient temperature for two hours and then cooled to  $-30$   $^{\circ}\text{C}$ . A solution of diethylphosphite (0.64 mL, 5 mmol, 1.0 eq.) in 5 mL THF was then added dropwise over 15 minutes to the mixture. The mixture was kept 15 minutes at  $0$   $^{\circ}\text{C}$ , then the cold bath was removed, and the mixture stirred for two hours at ambient

temperature. 30 mL 0.3N HCl was added dropwise over 10 minutes at 0 °C, then 20 mL ethyl acetate was added to the mixture. The mixture was extracted with EtOAc and the organic phase was dried with MgSO<sub>4</sub>, and then filtered through a Celite pad. Solvents were removed *in vacuo* to give 843 mg (79% yield) of dithienylphosphine oxide as a yellow oil.

<sup>31</sup>P{<sup>1</sup>H} NMR (CDCl<sub>3</sub>): δ -1.2 (*J*<sub>PH</sub> = 515.4 Hz). <sup>1</sup>H NMR (CDCl<sub>3</sub>): δ 7.22-7.25 (m, 2H, Th), 7.64-7.81 (m, 4H, Th), 8.46 (d, <sup>1</sup>*J*<sub>PH</sub> = 515.4 Hz, 1H, PH). <sup>13</sup>C{<sup>1</sup>H} NMR (CDCl<sub>3</sub>): δ 128.48 (d, *J*<sub>CP</sub> = 15.2 Hz, CH, Th), 131.78 (d, *J*<sub>CP</sub> = 116.6 Hz, C, Th), 124.55 (d, *J*<sub>CP</sub> = 5.6 Hz, CH, Th), 136.04 (d, *J*<sub>CP</sub> = 12.4 Hz, CH, Th). HRMS: *m/z* 646.9139 (calcd for C<sub>19</sub>H<sub>13</sub>O<sub>6</sub>P<sub>2</sub>S<sub>2</sub>W: [M+H]<sup>+</sup>, 646.9138).

#### General procedure and characterization data for **2f**, **2g**:

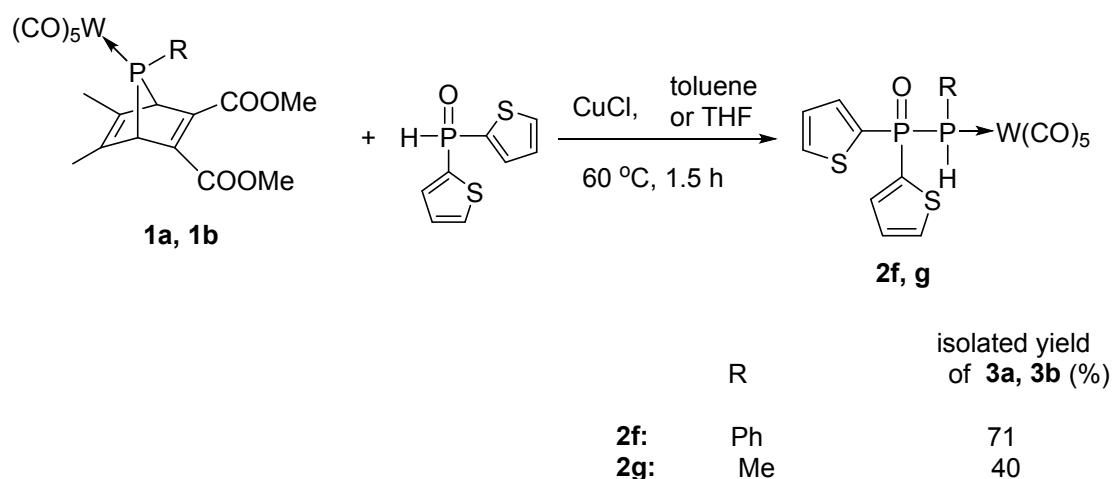

A solution of 7-R-7-phosphanorbornadiene complex **1a-1b** (0.8 mmol, 1eq), dithienylphosphine oxide (0.8 mmol, 1eq) and CuCl (0.3 mmol) in toluene or THF (10 mL) was stirred at 60 °C for 1.5 h. The solvents were



removed *in vacuo*, and the residue was chromatographed at -15°C on silica gel using a 50:1 dichloromethane:THF mixture, to give a yellowish solid.

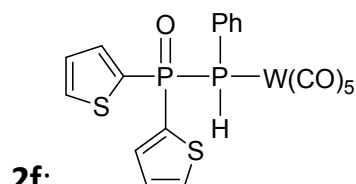

463 mg, 71 %.

$^{31}\text{P}\{^1\text{H}\}$  NMR ( $\text{CDCl}_3$ ):  $\delta$  21.0 ( $J_{\text{PP}} = 46.9$  Hz,  $\text{P}^{\text{V}}$ ), -19.9 ( $J_{\text{PP}} = 46.9$  Hz,  $^1J_{\text{PW}} = 228.3$  Hz,  $^1J_{\text{PH}} = 330.6$  Hz,  $\text{P}^{\text{III}}$ ).  $^1\text{H}$  NMR ( $\text{CDCl}_3$ ):  $\delta$  6.19 (dd,  $^1J_{\text{PH}} = 330.3$  Hz,  $^2J_{\text{PH}} = 2.7$  Hz, 1H, PH), 7.10 (s, 1H, Ph), 7.26-7.43 (m, 7H, Ph, Th), 7.67-7.74 (m, 2H, Ph), 7.84-7.86 (m, 1H, Th).  $^{13}\text{C}\{^1\text{H}\}$  NMR ( $\text{CDCl}_3$ ):  $\delta$  126.48 (d,  $^1J_{\text{CP}} = 35.2$  Hz, C, Ph), 128.64 (d,  $J_{\text{CP}} = 14.5$  Hz, CH, Ph), 128.99 (d,  $J_{\text{CP}} = 14.6$  Hz, CH, Ph), 129.02 (d,  $J_{\text{CP}} = 1.7$  Hz, CH, Th), 129.15 (d,  $J_{\text{CP}} = 1.6$  Hz, CH, Th), 130.27 (dd,  $^1J_{\text{CP}} = 99.6$  Hz,  $^2J_{\text{CP}} = 17.1$  Hz, C, Th), 130.62 (dd,  $^1J_{\text{CP}} = 100.9$  Hz,  $^2J_{\text{CP}} = 15.7$  Hz, C, Th), 131.42 (t, CH, Ph), 133.62 (d,  $J_{\text{CP}} = 3.6$  Hz, CH, Ph), 133.76 (d,  $J_{\text{CP}} = 3.5$  Hz, CH, Ph), 135.16 (d,  $J_{\text{CP}} = 4.7$  Hz, CH, Th), 135.36 (d,  $J_{\text{CP}} = 4.6$  Hz, CH, Th), 137.15 (d,  $J_{\text{CP}} = 10.0$  Hz, CH, Th), 137.47 (d,  $J_{\text{CP}} = 9.9$  Hz, CH, Th), 194.70 (dd,  $^2J_{\text{CP}} = 6.6$  Hz,  $^3J_{\text{CP}} = 2.0$  Hz,  $^1J_{\text{CW}} = 127.5$  Hz, CO *cis*), 197.42 (d,  $^2J_{\text{CP}} = 25.5$  Hz, CO *trans*). HRMS:  $m/z$  646.9139 (calcd for  $\text{C}_{19}\text{H}_{13}\text{O}_6\text{P}_2\text{S}_2\text{W}$ :  $[\text{M}+\text{H}]^+$ , 646.9138). IR (KBr)  $\nu(\text{CO})$  2077 s, 1991 s, 1940 vs, 1913 vs  $\text{cm}^{-1}$ . Anal. Calcd for  $\text{C}_{19}\text{H}_{12}\text{O}_6\text{P}_2\text{S}_2\text{W}$ : C, 35.31; H, 1.87; S, 9.92.

Found: C, 35.38; H, 1.90; S, 9.71.

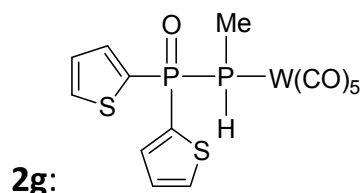

182 mg, 40 %.

$^{31}\text{P}\{^1\text{H}\}$  NMR ( $\text{CDCl}_3$ ):  $\delta$  20.7 ( $J_{\text{PP}} = 38.2$  Hz,  $\text{P}^{\text{V}}$ ), -54.2 ( $J_{\text{PP}} = 38.0$  Hz,  $^1J_{\text{PW}} = 226.0$  Hz,  $^1J_{\text{PH}} = 322.9$  Hz,  $\text{P}^{\text{III}}$ ).  $^1\text{H}$  NMR ( $\text{CDCl}_3$ ):  $\delta$  1.81-1.89 (m, 3H,  $\text{CH}_3$ ), 5.40 (dm,  $^1J_{\text{PH}} = 323.1$  Hz, 1H, PH), 7.32 (s, 2H, Th), 7.79-7.90 (m, 4H, Th).  $^{13}\text{C}\{^1\text{H}\}$  NMR ( $\text{CDCl}_3$ ):  $\delta$  8.19 (d,  $J_{\text{CP}} = 22.0$  Hz,  $\text{CH}_3$ ), 129.13 (d,  $J_{\text{CP}} = 14.5$  Hz, CH, Th), 129.84 (dd,  $^1J_{\text{CP}} = 102.5$  Hz,  $^2J_{\text{CP}} = 18.9$  Hz, C, Th), 130.37 (dd,  $^1J_{\text{CP}} = 100.5$  Hz,  $^2J_{\text{CP}} = 15.3$  Hz, C, Th), 135.50 (d,  $J_{\text{CP}} = 4.8$  Hz, CH, Th), 135.67 (d,  $J_{\text{CP}} = 4.5$  Hz, C, Th), 137.41 (d,  $J_{\text{CP}} = 10.0$  Hz, CH, Th), 137.71 (d,  $J_{\text{CP}} = 10.0$  Hz, CH, Th), 194.74 (dd,  $^2J_{\text{CP}} = 6.6$  Hz,  $^3J_{\text{CP}} = 2.0$  Hz,  $^1J_{\text{CW}} = 125.1$  Hz, CO *cis*), 197.40 (d,  $^2J_{\text{CP}} = 25.0$  Hz, CO *trans*). HRMS:  $m/z$  584.8974 (calcd for  $\text{C}_{14}\text{H}_{11}\text{O}_6\text{P}_2\text{S}_2\text{W}$ :  $[\text{M}+\text{H}]^+$ , 584.8982). IR (KBr)  $\nu(\text{CO})$  2077 s, 1991 s, 1910 vs  $\text{cm}^{-1}$ . Anal. Calcd for  $\text{C}_{14}\text{H}_{10}\text{O}_6\text{P}_2\text{S}_2\text{W}$ : C, 28.79; H, 1.73; S, 10.98. Found: C, 28.75; H, 1.71; S, 10.83.

**Procedure and characterization data for compound 4:**

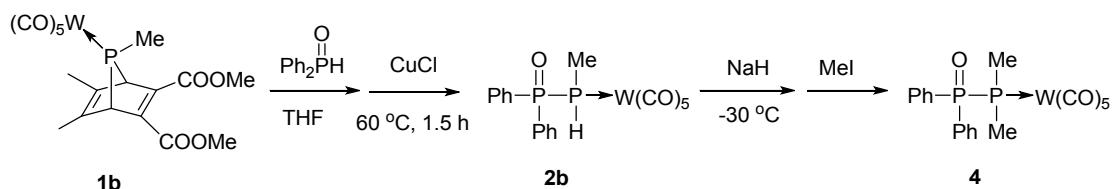

A solution of 7-Me-7-phosphanorbornadiene complex **1b** (300 mg, 0.5 mmol), diphenylphosphine oxide (105 mg, 0.5 mmol) and CuCl (25mg, 0.25 mmol) in THF (10 mL) was stirred at 60 °C for 1.5 h. Then NaH (60%, 20 mg, 0.5 mmol) was added at -30°C, the mixture was stirred at ambient temperature for 30 min. MeI (40  $\mu$ L, 0.6 mmol) was added to the mixture at ambient temperature and stirred for 20 min. The solvents were removed *in vacuo*. A light yellow solid (140 mg, 60 %) was recovered by TLC using DCM as the eluent.

$^{31}\text{P}\{^1\text{H}\}$  NMR ( $\text{CDCl}_3$ ):  $\delta$  35.3 ( $J_{\text{PP}} = 78.7$  Hz,  $\text{P}^{\text{V}}$ ), -33.6 ( $J_{\text{PP}} = 78.6$  Hz,  $^1J_{\text{PW}} = 228.2$  Hz,  $\text{P}^{\text{III}}$ ),.  $^1\text{H}$  NMR ( $\text{CDCl}_3$ ): 1.83 (dd,  $J_{\text{PH}} = 2.5\text{Hz}$ ,  $J_{\text{PH}} = 1.6\text{Hz}$ ,  $\text{CH}_3$ ), 7.57-7.67 (m, 6H, Ph), 7.83-7.90 (m, 4H, Ph).  $^{13}\text{C}\{^1\text{H}\}$  NMR ( $\text{CDCl}_3$ ):  $\delta$  15.75 (dd,  $^1J_{\text{CP}} = 22.2$  Hz,  $^2J_{\text{CP}} = 1.6$  Hz,  $\text{CH}_3$ ), 129.16 (d,  $J_{\text{CP}} = 12.0$  Hz, CH, Ph), 129.37 (dd,  $^1J_{\text{CP}} = 86.6$  Hz,  $^2J_{\text{CP}} = 14.0$  Hz, C, Ph), 131.75 (dd,  $J_{\text{CP}} = 9.6$  Hz,  $J_{\text{CP}} = 1.0$  Hz, CH, Ph), 133.09 (d,  $J_{\text{CP}} = 2.6$  Hz, CH, Ph), 195.96 (d,  $^2J_{\text{CP}} = 6.6$  Hz,  $^1J_{\text{CW}} = 124.9$  Hz, CO *cis*), 198.15 (d,  $^2J_{\text{CP}} = 23.1$  Hz, CO *trans*). HRMS:  $m/z$  587.0005 (calcd for  $\text{C}_{19}\text{H}_{16}\text{O}_6\text{P}_2\text{W}$ :  $[\text{M}+\text{H}]^+$ , 587.0004). IR (KBr)  $\nu(\text{CO})$  2074 w, 1983 w, 1933 vs, 1912  $\text{cm}^{-1}$ . Anal. Calcd for  $\text{C}_{19}\text{H}_{16}\text{O}_6\text{P}_2\text{W}$ : C,

38.93; H, 2.75. Found: C, 38.91; H, 2.71.

**Procedure and characterization data for compound 5:**

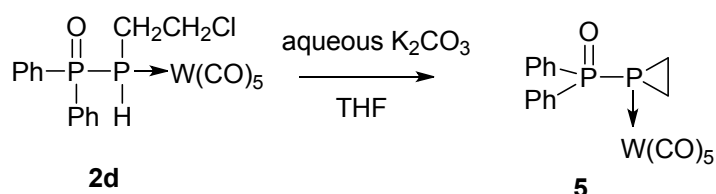

Aqueous  $\text{K}_2\text{CO}_3$  (4 mL, 0.2 mol/L) was added dropwise to a solution of **2d** (139 mg, 0.22 mmol) in THF (3 mL) at r. t. and stirred for 10 min. The mixture was extracted with  $\text{Et}_2\text{O}$  and the solvents were removed *in vacuo*. The residue was chromatographed at  $-15^\circ\text{C}$  on silica gel using a 50:1 dichloromethane:THF mixture, to give a yellowish solid (114 mg, 89 %).

$^{31}\text{P}\{^1\text{H}\}$  NMR ( $\text{CDCl}_3$ ):  $\delta$  34.8 ( $J_{\text{PP}} = 129.4$  Hz,  $\text{P}^{\text{V}}$ ), -226.0 ( $J_{\text{PP}} = 129.2$  Hz,  $J_{\text{PW}} = 240.1$  Hz,  $\text{P}^{\text{III}}$ ),.  $^1\text{H}$  NMR ( $\text{CDCl}_3$ ): 1.54-1.61 (m, 2H,  $\text{CH}_2$ ), 2.15-2.24 (m, 2H,  $\text{CH}_2$ ), 7.57-7.68 (m, 6H, Ph), 7.80-7.86 (m, 4H, Ph).  $^{13}\text{C}\{^1\text{H}\}$  NMR ( $\text{CDCl}_3$ ):  $\delta$  10.79 (d,  $J_{\text{CP}} = 18.8$  Hz,  $\text{CH}_2$ ), 129.29 (d,  $J_{\text{CP}} = 12.5$  Hz, CH, Ph), 129.74 (dd,  $J_{\text{CP}} = 92.5$  Hz,  $J_{\text{CP}} = 16.8$  Hz, C, Ph), 131.95 (dd,  $J_{\text{CP}} = 10.4$  Hz,  $J_{\text{CP}} = 2.3$  Hz, CH, Ph), 133.26 (d,  $J_{\text{CP}} = 2.6$  Hz, CH, Ph), 194.70 (d,  $J_{\text{CP}} = 7.2$  Hz,  $J_{\text{CW}} = 125.8$  Hz, CO *cis*), 196.03 (dd,  $J_{\text{CP}} = 33.0$  Hz,  $J_{\text{CP}} = 2.9$  Hz, CO *trans*). HRMS:  $m/z$  584.9850 (calcd for  $\text{C}_{19}\text{H}_{15}\text{O}_6\text{P}_2\text{W}$ :  $[\text{M}+\text{H}]^+$ , 584.9853).

IR (KBr)  $\nu(\text{CO})$  2076 s, 1917 vs  $\text{cm}^{-1}$ . Anal. Calcd for  $\text{C}_{19}\text{H}_{14}\text{O}_6\text{P}_2\text{W}$ : C, 39.07; H, 2.42. Found: C, 39.17; H, 2.31.

**Procedure and characterization data for compound 6:**

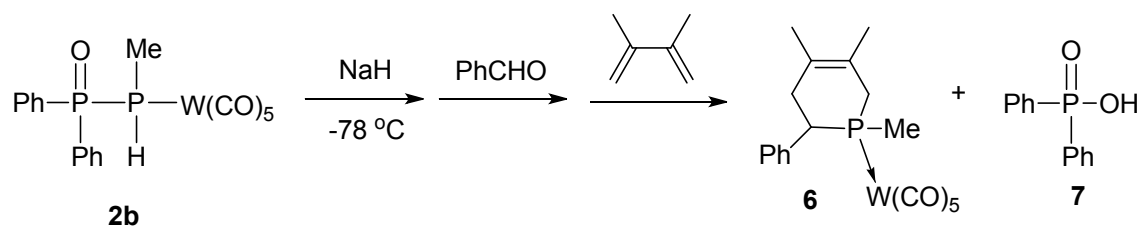

PhCHO (55  $\mu\text{L}$ , 0.5 mmol), and excess of 2,3-dimethyl-1,3-butadiene (565  $\mu\text{L}$ , 5 mmol) was added to a solution of **2b** (286 mg, 0.5 mmol) in THF (8 mL) successively. Then NaH (20 mg, 0.5 mmol) was added to the solution at  $-78\text{ }^\circ\text{C}$  and stirred at room temperature for 10 min. The solvents were removed in *vacuo*. The residue was washed with THF to give **7** (78 mg, 72 %) as a white solid. Then the residue was chromatographed on silica gel using petroleum ether to give **6** as a yellowish oil (81mg, 30 %).

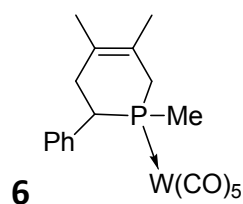

$^{31}\text{P}\{^1\text{H}\}$  NMR ( $\text{CDCl}_3$ ):  $\delta$  -17.9 ( $J_{\text{PW}} = 239.6\text{ Hz}$ ).  $^1\text{H}$  NMR ( $\text{CDCl}_3$ ): 1.61 (d,  $^2J_{\text{PH}} = 6.6\text{ Hz}$ , 3H,  $\text{CH}_3\text{P}$ ), 1.74 (s, 3H,  $\text{CH}_3$ ), 1.82 (s, 3H,  $\text{CH}_3$ ), 2.44-2.58 (m, 2H,  $\text{CH}_2$ ), 2.65-2.81 (m, 2H,  $\text{CH}_2$ ), 3.09-3.18 (m, 1H, CH), 7.25-7.33 (m, 5H, Ph).  $^{13}\text{C}\{^1\text{H}\}$  NMR ( $\text{CDCl}_3$ ):  $\delta$  18.57 (d,  $^1J_{\text{CP}} = 25.0\text{ Hz}$ ,  $\text{CH}_3\text{P}$ ), 20.14 (d,  $J_{\text{CP}} = 1.5\text{ Hz}$ ,  $\text{CH}_3$ ), 21.57 (d,  $J_{\text{CP}} = 8.1\text{ Hz}$ ,  $\text{CH}_3$ ), 36.51 (s,  $\text{CH}_2$ ), 37.71 (d,  $^1J_{\text{CP}} =$

25.1 Hz, CH<sub>2</sub>P), 44.0 (d,  $^1J_{CP}$  = 21.7 Hz, CHP), 121.33 (d,  $J_{CP}$  = 4.1 Hz, =C-), 127.52 (d,  $J_{CP}$  = 3.0 Hz, CH, Ph), 128.08 (d,  $J_{CP}$  = 9.4 Hz, =C-), 128.31 (d,  $J_{CP}$  = 4.8 Hz, CH, Ph), 128.83 (d,  $J_{CP}$  = 2.4 Hz, CH, Ph), 138.86 (d,  $J_{CP}$  = 0.7 Hz, C, Ph), 196.70 (d,  $J_{CP}$  = 7.2 Hz, CO *cis*), 198.98 (d,  $J_{CP}$  = 21.5 Hz, CO *trans*).

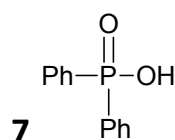

$^{31}\text{P}\{^1\text{H}\}$  NMR (CD<sub>3</sub>OD):  $\delta$  20.63.  $^1\text{H}$  NMR (CD<sub>3</sub>OD):  $\delta$  5.07 (s, 1H), 7.35-7.38 (m, 6H, Ph), 7.77-7.84 (m, 4H, Ph).  $^{13}\text{C}\{^1\text{H}\}$  NMR (CD<sub>3</sub>OD):  $\delta$  127.49 (d,  $J_{CP}$  = 12.1 Hz, CH, Ph), 129.65 (d,  $J_{CP}$  = 2.2 Hz, CH, Ph *para*), 130.91 (d,  $J_{CP}$  = 9.4 Hz, CH, Ph), 139.41 (d,  $J_{CP}$  = 131.7 Hz, C, Ph *ipso*).

#### Procedure and characterization data for compound **8a,b**:

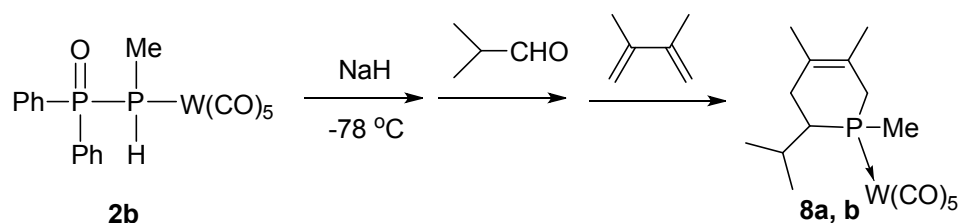

Isobutyraldehyde (46  $\mu\text{L}$ , 0.5 mmol), and excess of 2,3-dimethyl-1,3-butadiene (565  $\mu\text{L}$ , 5 mmol) was added to a solution of **2b** (286 mg, 0.5 mmol) in THF (8 mL) successively. Then NaH (20 mg, 0.5 mmol) was added to the solution at  $-78\text{ }^\circ\text{C}$  and stirred at room temperature for 10 min. The solvents were removed in *vacuo*. The residue was chromatographed on silica gel using petroleum ether to give a mixture of **8a, b** as a yellowish solid (53 mg, 21 %, **8a:8b** = 1:0.8).

**8a:**  $^{31}\text{P}\{^1\text{H}\}$  NMR ( $\text{CDCl}_3$ ):  $\delta$  -22.4 ( $J_{\text{PW}} = 230.8$  Hz).  $^1\text{H}$  NMR ( $\text{CDCl}_3$ ): 0.90 (d,  $J = 6.9$  Hz, 3H,  $\text{CH}_3$ ), 1.10 (d,  $J = 2.7$  Hz, 3H,  $\text{CH}_3$ ), 1.53 (d,  $J = 6.9$  Hz, 3H,  $\text{CH}_3$ ), 1.66-1.72 (m, 6H,  $\text{CH}_3$ ), 1.77-1.79 (m, 1H, CH), 2.03-2.20 (m, 2H,  $\text{CH}_2$ ), 2.28-2.50 (m, 3H, CH +  $\text{CH}_2$ ).  $^{13}\text{C}\{^1\text{H}\}$  NMR ( $\text{CDCl}_3$ ):  $\delta$  12.55 (d,  $^1J_{\text{CP}} = 23.0$  Hz,  $\text{CH}_3\text{P}$ ), 17.50 (d,  $J_{\text{CP}} = 1.7$  Hz,  $\text{CH}_3$ ), 20.43 (s,  $\text{CH}_3$ ), 21.11 (d,  $J_{\text{CP}} = 8.2$  Hz,  $\text{CH}_3$ ), 22.56 (d,  $J_{\text{CP}} = 14.6$  Hz,  $\text{CH}_3$ ), 29.76 (d,  $J_{\text{CP}} = 4.4$  Hz, CH), 35.14 (s,  $\text{CH}_2$ ), 38.83 (d,  $^1J_{\text{CP}} = 29.2$  Hz,  $\text{CH}_2\text{P}$ ), 40.14 (d,  $^1J_{\text{CP}} = 24.2$  Hz,  $\text{CHP}$ ), 121.13 (d,  $J_{\text{CP}} = 8.0$  Hz,  $=\text{C}-$ ), 126.91 (d,  $J_{\text{CP}} = 7.0$  Hz,  $=\text{C}-$ ), 197.11 (d,  $J_{\text{CP}} = 7.2$  Hz, CO *cis*), 199.55 (d,  $J_{\text{CP}} = 19.8$  Hz, CO *trans*).

**8b:**  $^{31}\text{P}\{^1\text{H}\}$  NMR ( $\text{CDCl}_3$ ):  $\delta$  -23.4 ( $J_{\text{PW}} = 230.1$  Hz).  $^1\text{H}$  NMR ( $\text{CDCl}_3$ ): 1.04 (d,  $J = 6.6$  Hz, 3H,  $\text{CH}_3$ ), 1.07 (d,  $J = 2.7$  Hz, 3H,  $\text{CH}_3$ ), 1.61 (d,  $J = 6.6$  Hz, 1H, CH), 1.66-1.72 (m, 9H,  $\text{CH}_3$ ), 1.87-1.94 (m, 1H, CH), 2.03-2.20 (m, 2H,  $\text{CH}_2$ ), 2.63-2.79 (m, 2H,  $\text{CH}_2$ ).  $^{13}\text{C}\{^1\text{H}\}$  NMR ( $\text{CDCl}_3$ ):  $\delta$  19.83 (d,  $J_{\text{CP}} = 1.7$  Hz,  $\text{CH}_3$ ), 20.03 (s,  $\text{CH}_3$ ), 20.89 (d,  $^1J_{\text{CP}} = 24.7$  Hz,  $\text{CH}_3\text{P}$ ), 21.29 (d,  $J_{\text{CP}} = 1.8$  Hz,  $\text{CH}_3$ ), 23.82 (d,  $J_{\text{CP}} = 6.6$  Hz,  $\text{CH}_3$ ), 27.62 (d,  $J_{\text{CP}} = 6.4$  Hz,  $\text{CH}_2$ ), 31.52 (d,  $J_{\text{CP}} = 3.5$  Hz, CH), 38.56 (d,  $^1J_{\text{CP}} = 29.0$  Hz,  $\text{CH}_2\text{P}$ ), 40.41 (d,  $^1J_{\text{CP}} = 22.2$  Hz,  $\text{CHP}$ ), 120.87 (d,  $J_{\text{CP}} = 3.8$  Hz,  $=\text{C}-$ ), 128.08 (d,  $J_{\text{CP}} = 10.9$  Hz,  $=\text{C}-$ ), 196.95 (d,  $J_{\text{CP}} = 7.1$  Hz, CO *cis*), 198.97 (d,  $J_{\text{CP}} = 20.1$  Hz, CO *trans*).

#### Procedure and characterization data for compound 9:

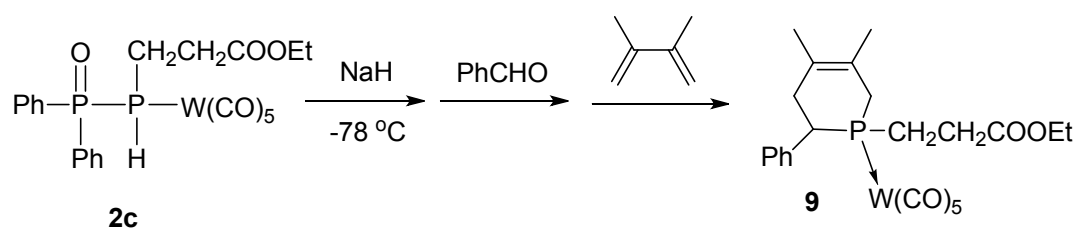

PhCHO (100  $\mu\text{L}$ , 1.0 mmol), and excess of 2,3-dimethyl-1,3-butadiene (1.13 mL, 10 mmol) was added to a solution of **2c** (658 mg, 1 mmol) in THF (10 mL) successively. Then NaH (40 mg, 1 mmol) was added to the solution at  $-78\text{ }^\circ\text{C}$  and stirred at room temperature for 10 min. The solvents were removed in *vacuo*. The residue was chromatographed on silica gel using petroleum ether/ ethyl acetate 10:1 to give a yellowish oil (152mg, 24%).

$^{31}\text{P}\{^1\text{H}\}$  NMR ( $\text{CDCl}_3$ ):  $\delta$  -7.4 ( $J_{\text{PW}} = 243.4\text{ Hz}$ ).  $^1\text{H}$  NMR ( $\text{CDCl}_3$ ): 1.25 (t,  $J_{\text{HH}} = 7.2\text{ Hz}$ , 3H,  $\text{CH}_3\text{ Et}$ ), 1.73 (s, 3H,  $\text{CH}_3$ ), 1.83 (s, 3H,  $\text{CH}_3$ ), 2.10-2.74 (m, 8H,  $\text{CH}_2$ ), 3.14-3.23 (m, 1H, CH), 4.14 (q,  $J_{\text{HH}} = 6.9\text{ Hz}$ , 2H,  $\text{CH}_2\text{ Et}$ ), 7.24-7.32 (m, 5H, Ph).  $^{13}\text{C}\{^1\text{H}\}$  NMR ( $\text{CDCl}_3$ ):  $\delta$  14.16 (s,  $\text{CH}_3$ ), 20.09 (d,  $J_{\text{CP}} = 1.1\text{ Hz}$ ,  $\text{CH}_3$ ), 21.65 (d,  $J_{\text{CP}} = 7.6\text{ Hz}$ ,  $\text{CH}_3$ ), 26.58 (d,  $J_{\text{CP}} = 23.2\text{ Hz}$ ,  $\text{CH}_2$ ), 29.36 (d,  $J_{\text{CP}} = 2.5\text{ Hz}$ ,  $\text{CH}_2$ ), 34.95 (d,  $J_{\text{CP}} = 24.1\text{ Hz}$ ,  $\text{CH}_2$ ), 36.91 (s,  $\text{CH}_2$ ), 42.11 (d,  $J_{\text{CP}} = 20.4\text{ Hz}$ , CHP), 61.06 (s,  $\text{CH}_2$ ), 121.40 (d,  $J_{\text{CP}} = 4.8\text{ Hz}$ ,  $=\text{C}-$ ), 127.73 (d,  $J_{\text{CP}} = 2.8\text{ Hz}$ , CH, Ph), 128.11 (d,  $J_{\text{CP}} = 9.2\text{ Hz}$ ,  $=\text{C}-$ ), 128.37 (d,  $J_{\text{CP}} = 4.8\text{ Hz}$ , CH, Ph), 129.04 (d,  $J_{\text{CP}} = 2.1\text{ Hz}$ , CH, Ph), 139.52 (s, C, Ph), 172.10 (d,  $J_{\text{CP}} = 14.8\text{ Hz}$ ,  $\text{C}=\text{O}$ ), 196.43 (d,  $J_{\text{CP}} = 7.0\text{ Hz}$ , CO *cis*), 198.14 (d,  $J_{\text{CP}} = 22.2\text{ Hz}$ , CO *trans*).
